# Supplementary material for: Implementing infrared determination of quartz particulates on novel filters for a prototype dust monitor
Source: Royal Society of Chemistry journal article supplement (doi:10.1039/b803804j), 2008-01-01
Supplement: b803804j.pdf [file b803804j.pdf]

## **Implementing infrared determination of quartz particulates on novel filters for a prototype dust monitor**

Donald P. Tuchman,\* Jon C. Volkwein and Robert P. Vinson

*US Department of Health and Human Services, Public Health Service, Centers for Disease Control and Prevention, National Institute for Occupational Safety and Health, Pittsburgh Research Laboratory, 626 Cochran Mill Road, Pittsburgh, PA 15236, USA*

### **Appendix A. Extended data tables**

#### **Table A-1:** P-7 analysis of ashed candidate filter assembly materials

Table A-1 reports the results for P-7 sample analysis of candidate materials. Integrated absorbances are recorded for peaks at ~915 (930-900) and ~800 (815-770)  $\text{cm}^{-1}$ , used for quantifying kaolin and quartz. Presumed (false) masses of these minerals are also recorded, resulting from calculations with the integrated absorbances. Estimates are given for bias, calculated as the mean of false quartz masses, and limit of quantitation (LOQ), calculated as ten times the root mean square of false quartz masses.

#### **Table A-2:** Open-face sample gravimetric and P-7 comparison analyses

Table A-2 records the results of the open-face PDM filter tests. The table reports gravimetrically assessed sample masses and the expected P-7 quartz results, using the 0.942 correction factor. Actual P-7 quartz measurements are also reported for both variations of reference spectra employed, as well as percent deviation of P-7 results from expected values. Data are pooled for each PDM filter type.

#### **Table A-3:** P-7 comparison analyses for PDM-collected and PVC filters

Table A-3 records the spectrometric results for the PDM-collection tests. The table reports P-7 measured quartz masses for the prototype PDM filters, the related PVC reference samples, and the percent difference between them. Data are grouped by test run for each PDM filter type. Individual PDM filter results are compared to mean reference filter results.

#### **Tables A-4 and A-5:** Gravimetric comparisons for polyester- or cellulose-back and PVC filters from PDM-collection tests

Tables A-4 and A-5 report the sample masses for the PDM-collection tests, based on gravimetric assessment of PVC filters and PDM filters of each type. Again, data are grouped by test run and individual PDM filter results are compared to mean PVC filter results. The tables also report PDM-assessed end-of-file (EOF) dust masses, the final instrument mass reading for each test file. Individual EOF results are compared to mean PVC filter and mean PDM filter gravimetric results. These tables address PDM dust measurement accuracy with the new prototype filters. Results are reported as mass measurements and percent differences for the comparisons made.

Supplementary Material (ESI) for Journal of Environmental Monitoring  
This journal is © The Royal Society of Chemistry 2008

**Table A-1** P-7 analysis of ashed candidate filter assembly materials

| Material tested                                     | Integrated absorbance     |                           | Mass/ $\mu\text{g}$ |                     | Bias est. <sup>c</sup> | LOQ est. <sup>d</sup> |
|-----------------------------------------------------|---------------------------|---------------------------|---------------------|---------------------|------------------------|-----------------------|
|                                                     | $\sim 915\text{ cm}^{-1}$ | $\sim 800\text{ cm}^{-1}$ | Kaolin <sup>a</sup> | Quartz <sup>b</sup> |                        |                       |
| PVC-acrylic membrane <sup>e</sup>                   | 0.0117                    | 0.0323                    | 0.5                 | 0.6                 | 0.3                    | 4.2                   |
|                                                     | 0.0061                    | 0.0195                    | 0.3                 | 0.4                 |                        |                       |
|                                                     | 0.0045                    | -0.0013                   | 0.2                 | -0.1                |                        |                       |
| PVC membrane <sup>e</sup>                           | 0.0079                    | 0.0158                    | 0.3                 | 0.3                 | 0.6                    | 6.7                   |
|                                                     | 0.0045                    | 0.0170                    | 0.2                 | 0.3                 |                        |                       |
|                                                     | 0.0050                    | 0.0613                    | 0.2                 | 1.2                 |                        |                       |
|                                                     | 0.0010                    | 0.0208                    | 0.0                 | 0.4                 |                        |                       |
| White PP ring/base sets with TiO <sub>2</sub>       | -0.0422                   | -0.7812                   | -1.8                | -15.4               | -22.5                  | 243.9                 |
|                                                     | -0.0468                   | -0.8371                   | -2.0                | -16.5               |                        |                       |
|                                                     | -0.0509                   | -1.7969                   | -2.2                | -35.7               |                        |                       |
| Clear PP ring/base sets                             | 0.0091                    | 0.0048                    | 0.4                 | 0.0                 | 0.3                    | 3.3                   |
|                                                     | 0.0121                    | 0.0249                    | 0.5                 | 0.4                 |                        |                       |
|                                                     | -0.0056                   | 0.0174                    | -0.2                | 0.4                 |                        |                       |
| High wt. PP electret blown melt fiber               | -0.0057                   | -0.0096                   | -0.2                | -0.2                | 0.0                    | 1.4                   |
|                                                     | 0.0053                    | 0.0061                    | 0.2                 | 0.1                 |                        |                       |
|                                                     | 0.0073                    | 0.0058                    | 0.3                 | 0.1                 |                        |                       |
| Med. wt. PP electret blown melt fiber               | 0.0129                    | -0.0057                   | 0.6                 | -0.2                | 0.2                    | 3.1                   |
|                                                     | 0.0088                    | 0.0156                    | 0.4                 | 0.3                 |                        |                       |
|                                                     | 0.0147                    | 0.0233                    | 0.6                 | 0.4                 |                        |                       |
| Spun bound cover for electret with TiO <sub>2</sub> | 0.0191                    | -0.1744                   | 0.8                 | -3.6                | -2.9                   | 29.9                  |
|                                                     | 0.0052                    | -0.1607                   | 0.2                 | -3.2                |                        |                       |
|                                                     | 0.0067                    | -0.0921                   | 0.3                 | -1.9                |                        |                       |
| Non-woven cover for electret                        | 0.0112                    | 0.0045                    | 0.5                 | 0.0                 | 0.0                    | 0.6                   |
|                                                     | 0.0343                    | 0.0119                    | 1.5                 | 0.0                 |                        |                       |
|                                                     | 0.0021                    | -0.0025                   | 0.1                 | -0.1                |                        |                       |
| All-nylon fibrous filter                            | -0.0108                   | 0.0482                    | -0.5                | 1.0                 | 1.3                    | 13.7                  |
|                                                     | -0.0102                   | 0.0368                    | -0.4                | 0.8                 |                        |                       |
|                                                     | -0.0133                   | 0.0973                    | -0.6                | 2.0                 |                        |                       |
| HEPA all-nylon fibrous filter <sup>f</sup>          | -0.0299                   | -0.0124                   | -1.3                | -0.1                | 0.5                    | 6.5                   |
|                                                     | 0.0460                    | 0.0378                    | 2.0                 | 0.5                 |                        |                       |
|                                                     | 0.0021                    | 0.0502                    | 0.1                 | 1.0                 |                        |                       |
| Cellulose with melamine binder                      | 0.0084                    | 0.0221                    | 0.4                 | 0.4                 | 0.5                    | 4.8                   |
|                                                     | 0.0086                    | 0.0310                    | 0.4                 | 0.6                 |                        |                       |
|                                                     | 0.0064                    | 0.0227                    | 0.3                 | 0.4                 |                        |                       |
| High strength cellulose                             | -0.0012                   | 0.0251                    | -0.1                | 0.5                 | 0.2                    | 3.1                   |
|                                                     | 0.0040                    | 0.0096                    | 0.2                 | 0.2                 |                        |                       |
|                                                     | -0.0008                   | 0.0000                    | 0.0                 | 0.0                 |                        |                       |

<sup>a</sup> (Kaolin mass in  $\mu\text{g}$ ) = (915  $\text{cm}^{-1}$  integr. abs.)/0.023

<sup>b</sup> (Quartz mass in  $\mu\text{g}$ ) = {(800  $\text{cm}^{-1}$  integr. abs.) - [(915  $\text{cm}^{-1}$  integr. abs.)/3.62]}/0.050

<sup>c</sup> Calculated as mean of quartz mass values. <sup>d</sup> Calculated as 10 x root mean square of quartz mass values.

<sup>e</sup> Reference filter materials. <sup>f</sup> Most promising new filter material.

Supplementary Material (ESI) for Journal of Environmental Monitoring  
 This journal is © The Royal Society of Chemistry 2008

**Table A-2** Open-face sample gravimetric and P-7 comparison analyses

| Sample type    | Grav.               | 0.942 x Grav.       | Reference = PVC-acrylic filter |                     | Reference = PVC-acrylic + PDM filters |                     |
|----------------|---------------------|---------------------|--------------------------------|---------------------|---------------------------------------|---------------------|
|                | mass/ $\mu\text{g}$ | mass/ $\mu\text{g}$ | P-7 mass/ $\mu\text{g}$        | P-7/Grav. diff. (%) | P-7 mass/ $\mu\text{g}$               | P-7/Grav. diff. (%) |
| Polyester-back | 529                 | 498                 | 495                            | -0.7                | 489                                   | -1.9                |
|                | 514                 | 484                 | 495                            | 2.2                 | 485                                   | 0.2                 |
|                | 514                 | 484                 | 485                            | 0.2                 | 482                                   | -0.5                |
|                | 512                 | 482                 | 474                            | -1.7                | 472                                   | -2.1                |
|                | 524                 | 494                 | 491                            | -0.5                | 489                                   | -0.9                |
|                | 517                 | 487                 | 496                            | 1.8                 | 492                                   | 1.0                 |
|                | 495                 | 466                 | 492                            | 5.5                 | 487                                   | 4.4                 |
|                | 498                 | 469                 | 466                            | -0.7                | 457                                   | -2.6                |
|                | 501                 | 472                 | 482                            | 2.1                 | 483                                   | 2.3                 |
|                | 513                 | 483                 | 495                            | 2.4                 | 495                                   | 2.4                 |
|                | Pooled mean =       | 511.7               | 482.0                          | 487.1               | 1.1                                   | 483.1               |
| Pooled SD =    | 10.9                | 10.3                | 10.3                           | 2.2                 | 11.1                                  | 2.3                 |
| Cellulose-back | 497                 | 468                 | 465                            | -0.7                | 467                                   | -0.3                |
|                | 498                 | 469                 | 461                            | -1.7                | 462                                   | -1.5                |
|                | 491                 | 463                 | 456                            | -1.4                | 456                                   | -1.4                |
|                | 487                 | 459                 | 461                            | 0.5                 | 461                                   | 0.5                 |
|                | 539                 | 508                 | 499                            | -1.7                | 501                                   | -1.3                |
|                | 488                 | 460                 | 448                            | -2.5                | 449                                   | -2.3                |
|                | 487                 | 459                 | 460                            | 0.3                 | 459                                   | 0.1                 |
|                | 484                 | 456                 | 458                            | 0.5                 | 458                                   | 0.5                 |
|                | 490                 | 462                 | 483                            | 4.6                 | 486                                   | 5.3                 |
|                | 539                 | 508                 | 504                            | -0.7                | 503                                   | -0.9                |
|                | Pooled mean =       | 500.0               | 471.0                          | 469.5               | -0.3                                  | 470.2               |
| Pooled SD =    | 21.0                | 19.8                | 19.1                           | 2.0                 | 19.3                                  | 2.1                 |

Supplementary Material (ESI) for Journal of Environmental Monitoring  
 This journal is © The Royal Society of Chemistry 2008

**Table A-3** P-7 comparison analyses for PDM-collected and PVC filters<sup>a</sup>

| PDM no. | Polyester-back filters          |                                 |                                   | Cellulose-back filters          |                                 |                                   |
|---------|---------------------------------|---------------------------------|-----------------------------------|---------------------------------|---------------------------------|-----------------------------------|
|         | PDM filter<br>P-7 mass/ $\mu$ g | PVC filter<br>P-7 mass/ $\mu$ g | PDM/PVC <sub>M</sub><br>diff. (%) | PDM filter<br>P-7 mass/ $\mu$ g | PVC filter<br>P-7 mass/ $\mu$ g | PDM/PVC <sub>M</sub><br>diff. (%) |
|         |                                 | 453                             |                                   |                                 | 445                             |                                   |
| 1       | 451                             | 448                             | 0.6                               | 451                             | 434                             | 1.6                               |
| 2       | 452                             | 443                             | 0.8                               | 451                             | 441                             | 1.6                               |
| 3       | 418                             | 449                             | -6.7                              | 435                             | 455                             | -2.0                              |
| Mean =  | 440.3                           | 448.3                           | -1.8                              | 445.7                           | 443.8                           | 0.4                               |
|         |                                 | 458                             |                                   |                                 | 489                             |                                   |
| 1       | 433                             | 474                             | -5.1                              | 448                             | 476                             | -4.8                              |
| 2       | 462                             | 438                             | 1.2                               | 466                             | 475                             | -1.0                              |
| 3       | 420                             | 456                             | -8.0                              | 460                             | 443                             | -2.3                              |
| Mean =  | 438.3                           | 456.5                           | -4.0                              | 458.0                           | 470.8                           | -2.7                              |
|         |                                 | 454                             |                                   |                                 | 402                             |                                   |
| 1       | 422                             | 448                             | -6.5                              | 408                             | 419                             | -0.5                              |
| 2       | 447                             | 451                             | -0.9                              | 417                             | 408                             | 1.6                               |
| 3       | 444                             | 452                             | -1.6                              | 413                             | 412                             | 0.7                               |
| Mean =  | 437.7                           | 451.3                           | -3.0                              | 412.7                           | 410.3                           | 0.6                               |
|         |                                 | 463                             |                                   |                                 | 430                             |                                   |
| 1       | 467                             | 447                             | 3.0                               | 422                             | 452                             | -3.5                              |
| 2       | 466                             | 457                             | 2.8                               | 436                             | 430                             | -0.3                              |
| 3       | -                               | 447                             | -                                 | 432                             | 438                             | -1.3                              |
| Mean =  | 466.5                           | 453.5                           | 2.9                               | 430.0                           | 437.5                           | -1.7                              |
|         |                                 | 439                             |                                   |                                 | 446                             |                                   |
| 1       | 413                             | 431                             | -4.0                              | 443                             | 450                             | -2.5                              |
| 2       | 428                             | 422                             | -0.5                              | 449                             | 471                             | -1.2                              |
| 3       | 417                             | 428                             | -3.0                              | 428                             | 450                             | -5.8                              |
| Mean =  | 419.3                           | 430.0                           | -2.5                              | 440.0                           | 454.3                           | -3.1                              |
|         |                                 | 431                             |                                   |                                 | 447                             |                                   |
| 1       | 460                             | 469                             | 2.4                               | 432                             | 449                             | -2.5                              |
| 2       | 449                             | 451                             | 0.0                               | 442                             | 440                             | -0.3                              |
| 3       | 445                             | 445                             | -0.9                              | 446                             | 437                             | 0.6                               |
| Mean =  | 451.3                           | 449.0                           | 0.5                               | 440.0                           | 443.3                           | -0.7                              |
|         |                                 | Pooled mean =                   | -1.6                              |                                 | Pooled mean =                   | -1.2                              |
|         |                                 | Pooled SD =                     | 3.5                               |                                 | Pooled SD =                     | 2.1                               |

<sup>a</sup> Subscript M denotes the mean of the sample type indicated.

Supplementary Material (ESI) for Journal of Environmental Monitoring  
 This journal is © The Royal Society of Chemistry 2008

**Table A-4** Gravimetric comparisons for polyester-back and PVC filters from PDM-collection tests<sup>a,b</sup>

| PDM no. | Mass/ $\mu$ g    |           |                  | Difference (%)       |                      |                      |
|---------|------------------|-----------|------------------|----------------------|----------------------|----------------------|
|         | PDM filter grav. | EOF value | PVC filter grav. | PDM/PVC <sub>M</sub> | EOF/PVC <sub>M</sub> | EOF/PDM <sub>M</sub> |
|         |                  |           | 475              |                      |                      |                      |
| 1       | 495              | 512       | 462              | 5.4                  | 9.1                  | 5.1                  |
| 2       | 494              | 513       | 467              | 5.2                  | 9.3                  | 5.3                  |
| 3       | 473              | -         | 474              | 0.7                  | -                    | -                    |
| Mean =  | 487.3            | 512.5     | 469.5            | 3.8                  | 9.2                  | 5.2                  |
|         |                  |           | 482              |                      |                      |                      |
| 1       | 484              | 494       | 491              | 1.1                  | 3.2                  | 1.5                  |
| 2       | 509              | 533       | 463              | 6.3                  | 11.3                 | 9.5                  |
| 3       | 467              | -         | 479              | -2.5                 | -                    | -                    |
| Mean =  | 486.7            | 513.5     | 478.8            | 1.7                  | 7.3                  | 5.5                  |
|         |                  |           | 471              |                      |                      |                      |
| 1       | 472              | 496       | 456              | 0.7                  | 5.9                  | 3.3                  |
| 2       | 479              | 499       | 479              | 2.2                  | 6.5                  | 3.9                  |
| 3       | 490              | -         | 468              | 4.6                  | -                    | -                    |
| Mean =  | 480.3            | 497.5     | 468.5            | 2.5                  | 6.2                  | 3.6                  |
|         |                  |           | 487              |                      |                      |                      |
| 1       | 510              | 521       | 472              | 4.7                  | 7.0                  | 2.9                  |
| 2       | 503              | 519       | 490              | 3.3                  | 6.6                  | 2.5                  |
| 3       | -                | -         | 499              | -                    | -                    | -                    |
| Mean =  | 506.5            | 520.0     | 487.0            | 4.0                  | 6.8                  | 2.7                  |
|         |                  |           | 457              |                      |                      |                      |
| 1       | 457              | 463       | 448              | 1.0                  | 2.3                  | 1.5                  |
| 2       | 463              | 485       | 448              | 2.3                  | 7.2                  | 6.4                  |
| 3       | 448              | -         | 457              | -1.0                 | -                    | -                    |
| Mean =  | 456.0            | 474.0     | 452.5            | 0.8                  | 4.8                  | 3.9                  |
|         |                  |           | 481              |                      |                      |                      |
| 1       | 503              | 510       | 484              | 4.5                  | 6.0                  | 3.8                  |
| 2       | 491              | 503       | 486              | 2.0                  | 4.5                  | 2.4                  |
| 3       | 480              | -         | 474              | -0.3                 | -                    | -                    |
| Mean =  | 491.3            | 506.5     | 481.3            | 2.1                  | 5.2                  | 3.1                  |
|         |                  |           |                  |                      |                      |                      |
|         |                  |           | Pooled mean =    | 2.4                  | 6.6                  | 4.0                  |
|         |                  |           | Pooled SD =      | 2.5                  | 2.5                  | 2.3                  |

<sup>a</sup> Subscript M denotes the mean of the sample type indicated. <sup>b</sup> PDM no. 3 EOF data was not included.

Supplementary Material (ESI) for Journal of Environmental Monitoring  
 This journal is © The Royal Society of Chemistry 2008

**Table A-5** Gravimetric comparisons for cellulose-back and PVC filters from PDM-collection tests<sup>a,b</sup>

| PDM no. | Mass/ $\mu$ g    |           |                  | Difference (%)       |                      |                      |
|---------|------------------|-----------|------------------|----------------------|----------------------|----------------------|
|         | PDM filter grav. | EOF value | PVC filter grav. | PDM/PVC <sub>M</sub> | EOF/PVC <sub>M</sub> | EOF/PDM <sub>M</sub> |
|         |                  |           | 482              |                      |                      |                      |
| 1       | 469              | 517       | 460              | -1.6                 | 8.5                  | 9.2                  |
| 2       | 476              | 529       | 490              | -0.1                 | 11.0                 | 11.8                 |
| 3       | 475              | -         | 474              | -0.3                 | -                    | -                    |
| Mean =  | 473.3            | 523.0     | 476.5            | -0.7                 | 9.8                  | 10.5                 |
|         |                  |           | 518              |                      |                      |                      |
| 1       | 468              | 537       | 507              | -6.1                 | 7.7                  | 12.4                 |
| 2       | 489              | 548       | 498              | -1.9                 | 9.9                  | 14.7                 |
| 3       | 476              | -         | 471              | -4.5                 | -                    | -                    |
| Mean =  | 477.7            | 542.5     | 498.5            | -4.2                 | 8.8                  | 13.6                 |
|         |                  |           | 432              |                      |                      |                      |
| 1       | 426              | 459       | 463              | -3.9                 | 3.6                  | 7.7                  |
| 2       | 426              | 467       | 434              | -3.9                 | 5.4                  | 9.5                  |
| 3       | 427              | -         | 444              | -3.7                 | -                    | -                    |
| Mean =  | 426.3            | 463.0     | 443.3            | -3.8                 | 4.5                  | 8.6                  |
|         |                  |           | 463              |                      |                      |                      |
| 1       | 455              | 458       | 468              | -2.0                 | -1.4                 | -1.4                 |
| 2       | 472              | 487       | 458              | 1.6                  | 4.8                  | 4.8                  |
| 3       | 467              | -         | 469              | 0.5                  | -                    | -                    |
| Mean =  | 464.7            | 472.5     | 464.5            | 0.0                  | 1.7                  | 1.7                  |
|         |                  |           | 475              |                      |                      |                      |
| 1       | 496              | 501       | 469              | 4.3                  | 5.3                  | 4.1                  |
| 2       | 483              | 495       | 485              | 1.5                  | 4.0                  | 2.8                  |
| 3       | 465              | -         | 474              | -2.3                 | -                    | -                    |
| Mean =  | 481.3            | 498.0     | 475.8            | 1.2                  | 4.7                  | 3.5                  |
|         |                  |           | 477              |                      |                      |                      |
| 1       | 443              | 486       | 464              | -5.4                 | 3.8                  | 8.8                  |
| 2       | 447              | 500       | 467              | -4.5                 | 6.8                  | 11.9                 |
| 3       | 450              | -         | 465              | -3.9                 | -                    | -                    |
| Mean =  | 446.7            | 493.0     | 468.3            | -4.6                 | 5.3                  | 10.4                 |
|         |                  |           |                  |                      |                      |                      |
|         |                  |           | Pooled mean =    | -2.0                 | 5.8                  | 8.0                  |
|         |                  |           | Pooled SD =      | 2.8                  | 3.3                  | 4.7                  |

<sup>a</sup> Subscript M denotes the mean of the sample type indicated. <sup>b</sup> PDM no. 3 EOF data was not included.
